# Supplementary material for: Impact of integrating zeolite and PGPR on restoring soil health and enhancing crop yields following the leaching process
Source: PeerJ journal article supplement (doi:10.7717/peerj.20810), 2026-02-26
Supplement: Leaching_stage_1_data_analysis.pdf [file Leaching_stage_1_data_analysis.pdf]

| Predictors                                           | EC            |                 |        | ESP           |                 |        | AI            |                 |        | BD            |                 |        | PR            |                 |        | Ca            |                 |        | Mg            |                 |        | K             |                 |   |
|------------------------------------------------------|---------------|-----------------|--------|---------------|-----------------|--------|---------------|-----------------|--------|---------------|-----------------|--------|---------------|-----------------|--------|---------------|-----------------|--------|---------------|-----------------|--------|---------------|-----------------|---|
|                                                      | Estimates     | std. Error      | p      | Estimates     | std. Error      | p      | Estimates     | std. Error      | p      | Estimates     | std. Error      | p      | Estimates     | std. Error      | p      | Estimates     | std. Error      | p      | Estimates     | std. Error      | p      | Estimates     | std. Error      |   |
| (Intercept)                                          | 11.24         | 0.27            | <0.001 | 29.79         | 0.65            | <0.001 | 0.21          | 0.02            | <0.001 | 1.47          | 0.01            | <0.001 | 7.90          | 0.56            | <0.001 | 9.26          | 0.16            | <0.001 | 8.78          | 0.15            | <0.001 | 0.73          | 0.01            | < |
| Leaching Procedure [L2]                              | -0.98         | 0.19            | <0.001 | -2.81         | 0.35            | <0.001 | 0.07          | 0.01            | <0.001 | 0.00          | 0.01            | 0.820  | 0.10          | 0.48            | 0.830  | 0.69          | 0.09            | <0.001 | -0.63         | 0.08            | <0.001 | -0.03         | 0.00            | < |
| Leaching Procedure [L3]                              | -2.21         | 0.19            | <0.001 | -6.16         | 0.35            | <0.001 | 0.19          | 0.01            | <0.001 | -0.03         | 0.01            | 0.022  | -1.24         | 0.48            | 0.014  | 1.51          | 0.09            | <0.001 | -1.39         | 0.08            | <0.001 | -0.07         | 0.00            | < |
| Leaching Procedure [L4]                              | -3.61         | 0.19            | <0.001 | -9.32         | 0.35            | <0.001 | 0.28          | 0.01            | <0.001 | -0.04         | 0.01            | 0.001  | -1.62         | 0.48            | 0.002  | 2.28          | 0.09            | <0.001 | -2.10         | 0.08            | <0.001 | -0.10         | 0.00            | < |
| Leaching Procedure [L5]                              | -5.02         | 0.19            | <0.001 | -12.53        | 0.35            | <0.001 | 0.33          | 0.01            | <0.001 | -0.04         | 0.01            | <0.001 | -1.83         | 0.48            | 0.001  | 3.07          | 0.09            | <0.001 | -2.83         | 0.08            | <0.001 | -0.13         | 0.00            | < |
| <b>Random Effects</b>                                |               |                 |        |               |                 |        |               |                 |        |               |                 |        |               |                 |        |               |                 |        |               |                 |        |               |                 |   |
| $\sigma^2$                                           | 0.16          |                 |        | 0.56          |                 |        | 0.00          |                 |        | 0.00          |                 |        | 1.04          |                 |        | 0.03          |                 |        | 0.03          |                 |        | 0.00          |                 |   |
| $\tau_{00}$                                          | 0.16          | Soil.Depth..cm. |        | 1.07          | Soil.Depth..cm. |        | 0.00          | Soil.Depth..cm. |        | 0.00          | Soil.Depth..cm. |        | 0.61          | Soil.Depth..cm. |        | 0.06          | Soil.Depth..cm. |        | 0.05          | Soil.Depth..cm. |        | 0.00          | Soil.Depth..cm. |   |
| ICC                                                  | 0.49          |                 |        | 0.66          |                 |        | 0.66          |                 |        | 0.37          |                 |        | 0.37          |                 |        | 0.66          |                 |        | 0.66          |                 |        | 0.66          |                 |   |
| N                                                    | 3             | Soil.Depth..cm. |        | 3             | Soil.Depth..cm. |        | 3             | Soil.Depth..cm. |        | 3             | Soil.Depth..cm. |        | 3             | Soil.Depth..cm. |        | 3             | Soil.Depth..cm. |        | 3             | Soil.Depth..cm. |        | 3             | Soil.Depth..cm. |   |
| Observations                                         | 45            |                 |        | 45            |                 |        | 45            |                 |        | 45            |                 |        | 45            |                 |        | 45            |                 |        | 45            |                 |        | 45            |                 |   |
| Marginal R <sup>2</sup> / Conditional R <sup>2</sup> | 0.912 / 0.955 |                 |        | 0.926 / 0.975 |                 |        | 0.932 / 0.977 |                 |        | 0.309 / 0.566 |                 |        | 0.291 / 0.551 |                 |        | 0.926 / 0.975 |                 |        | 0.926 / 0.975 |                 |        | 0.926 / 0.975 |                 |   |
